# Supplementary material for: Genome diversity of tuber-bearing Solanum uncovers complex evolutionary history and targets of domestication in the cultivated potato
Source: PubMed Central journal article supplement — Proc Natl Acad Sci U S A. 2017 Oct 30;114(46):E9999–E10008. doi: 10.1073/pnas.1714380114 (PMC5699086; doi:10.1073/pnas.1714380114), 2017-10-30

# Chromosome 1

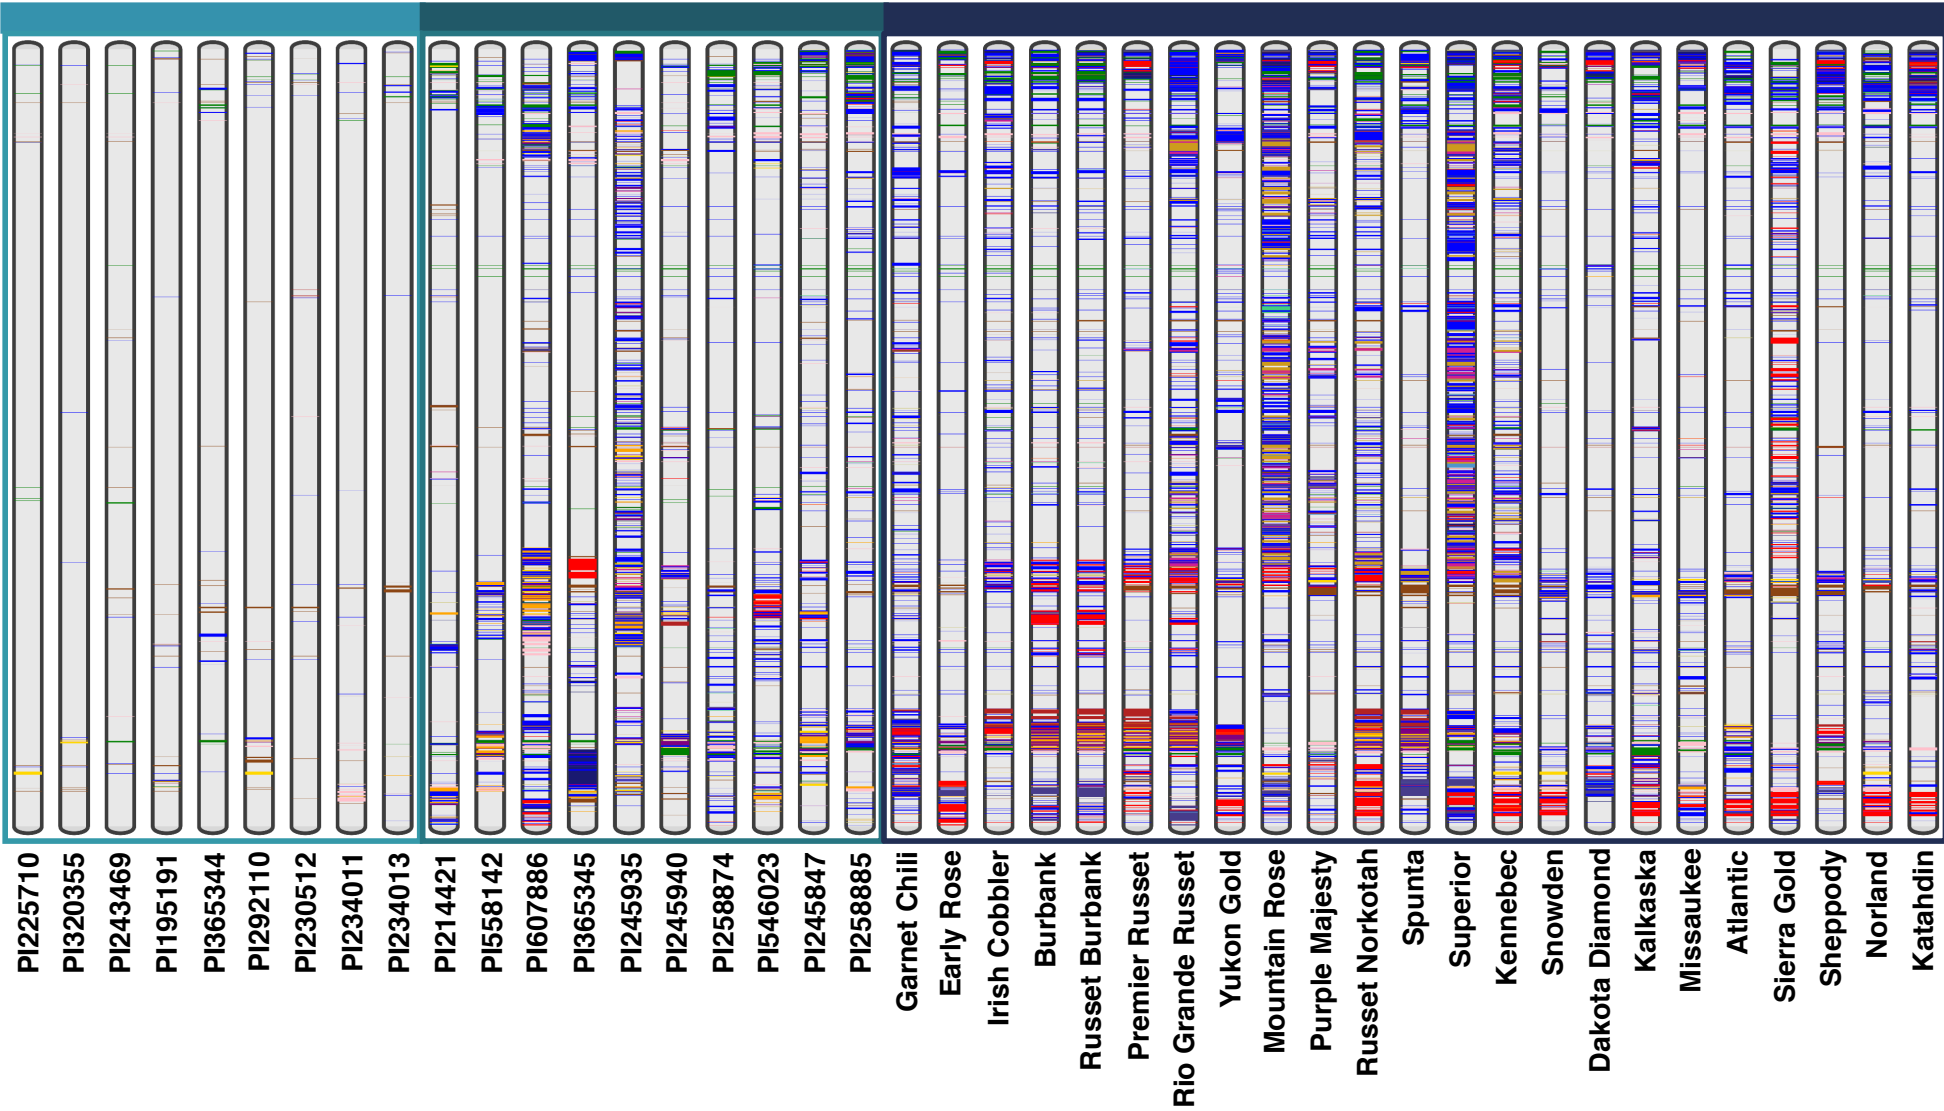

# Chromosome 2

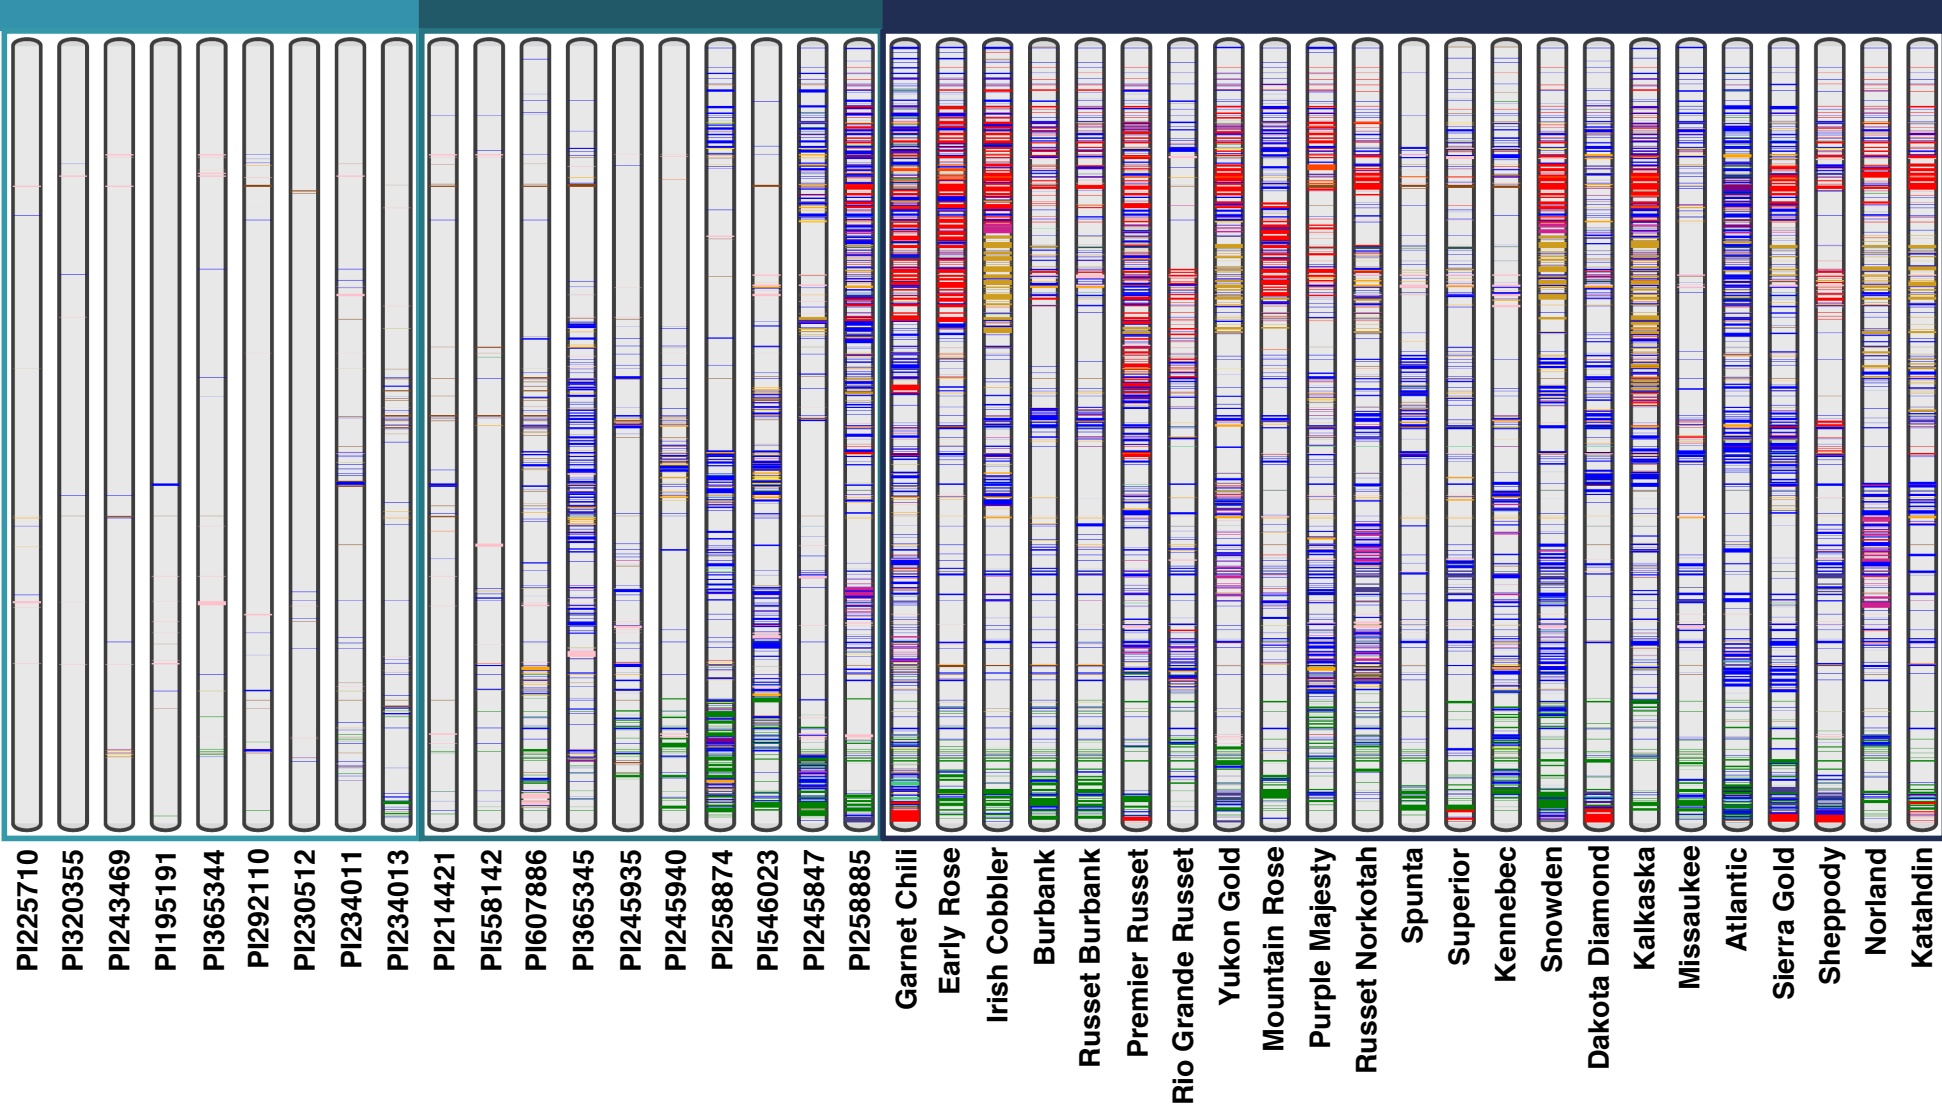

# Chromosome 3

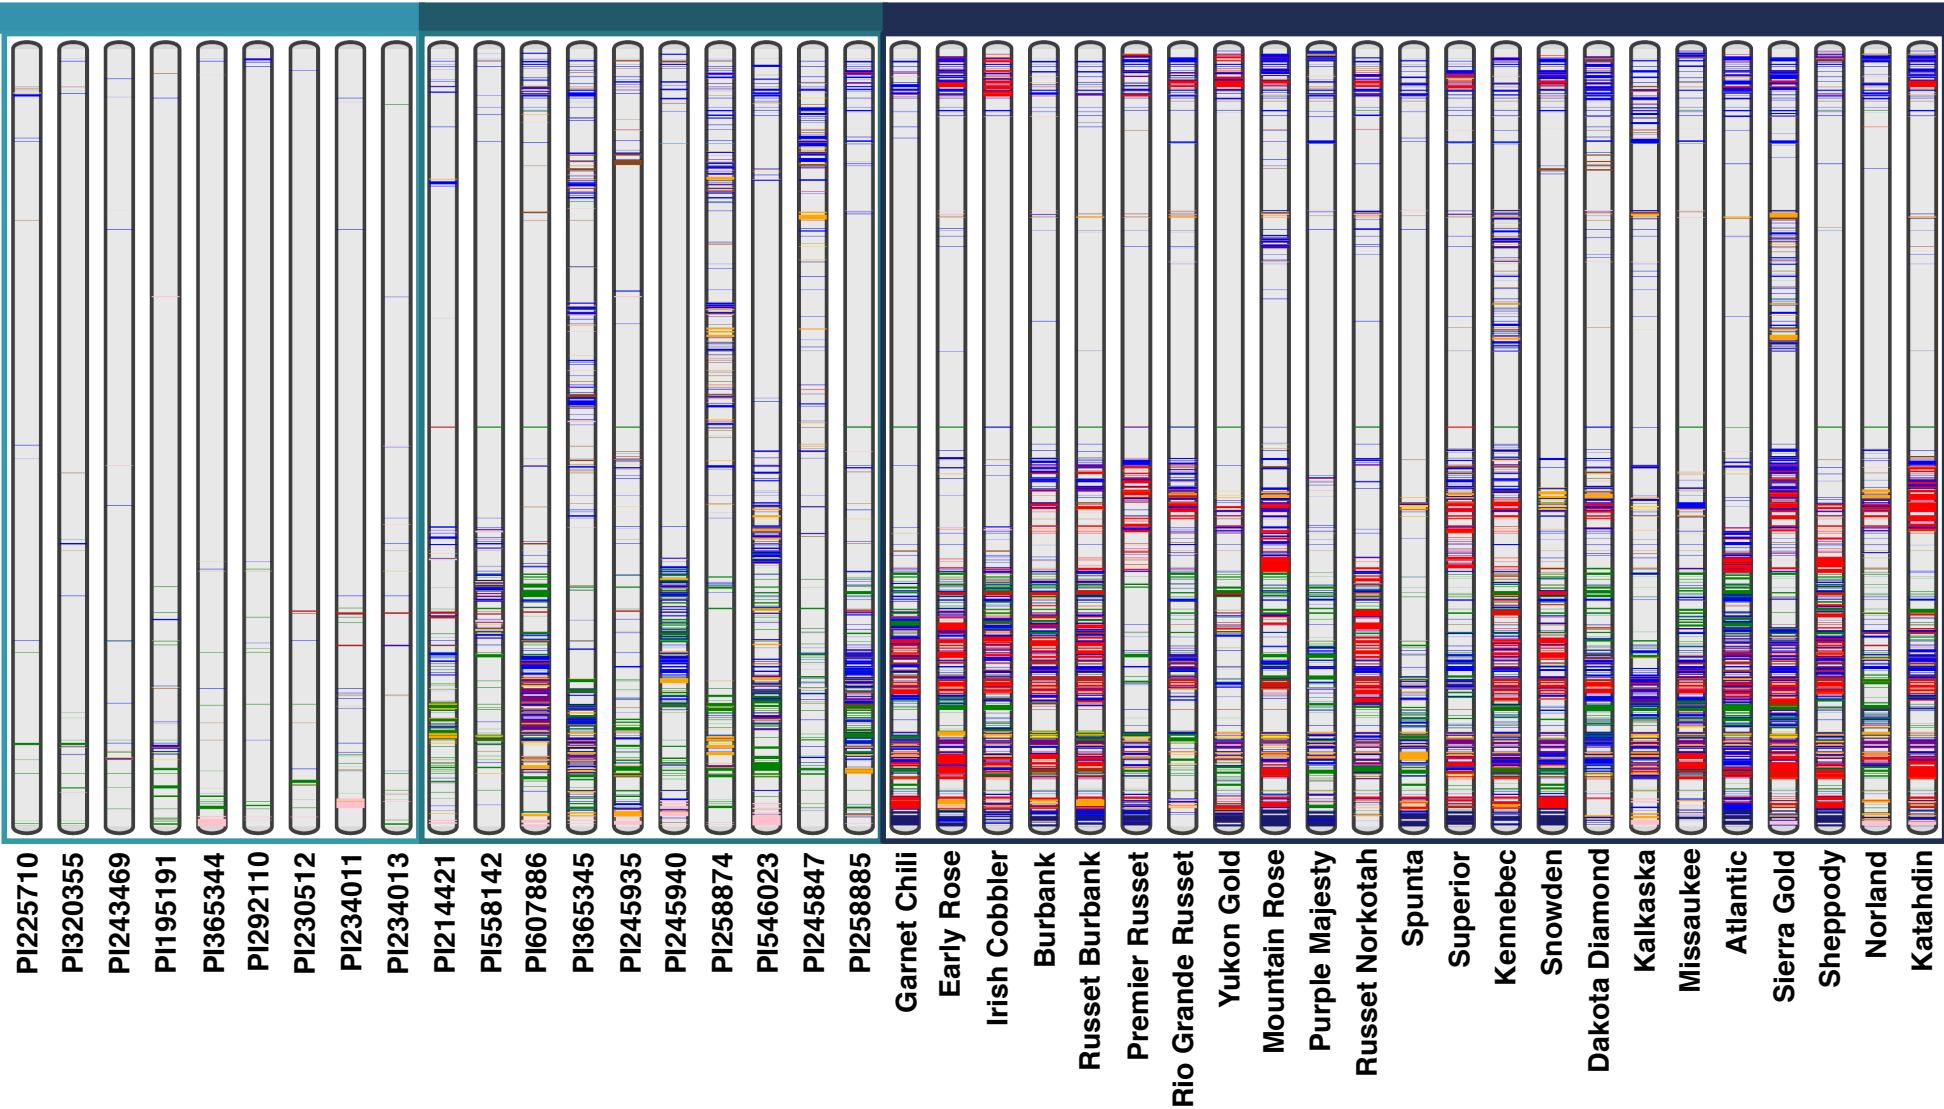

# Chromosome 4

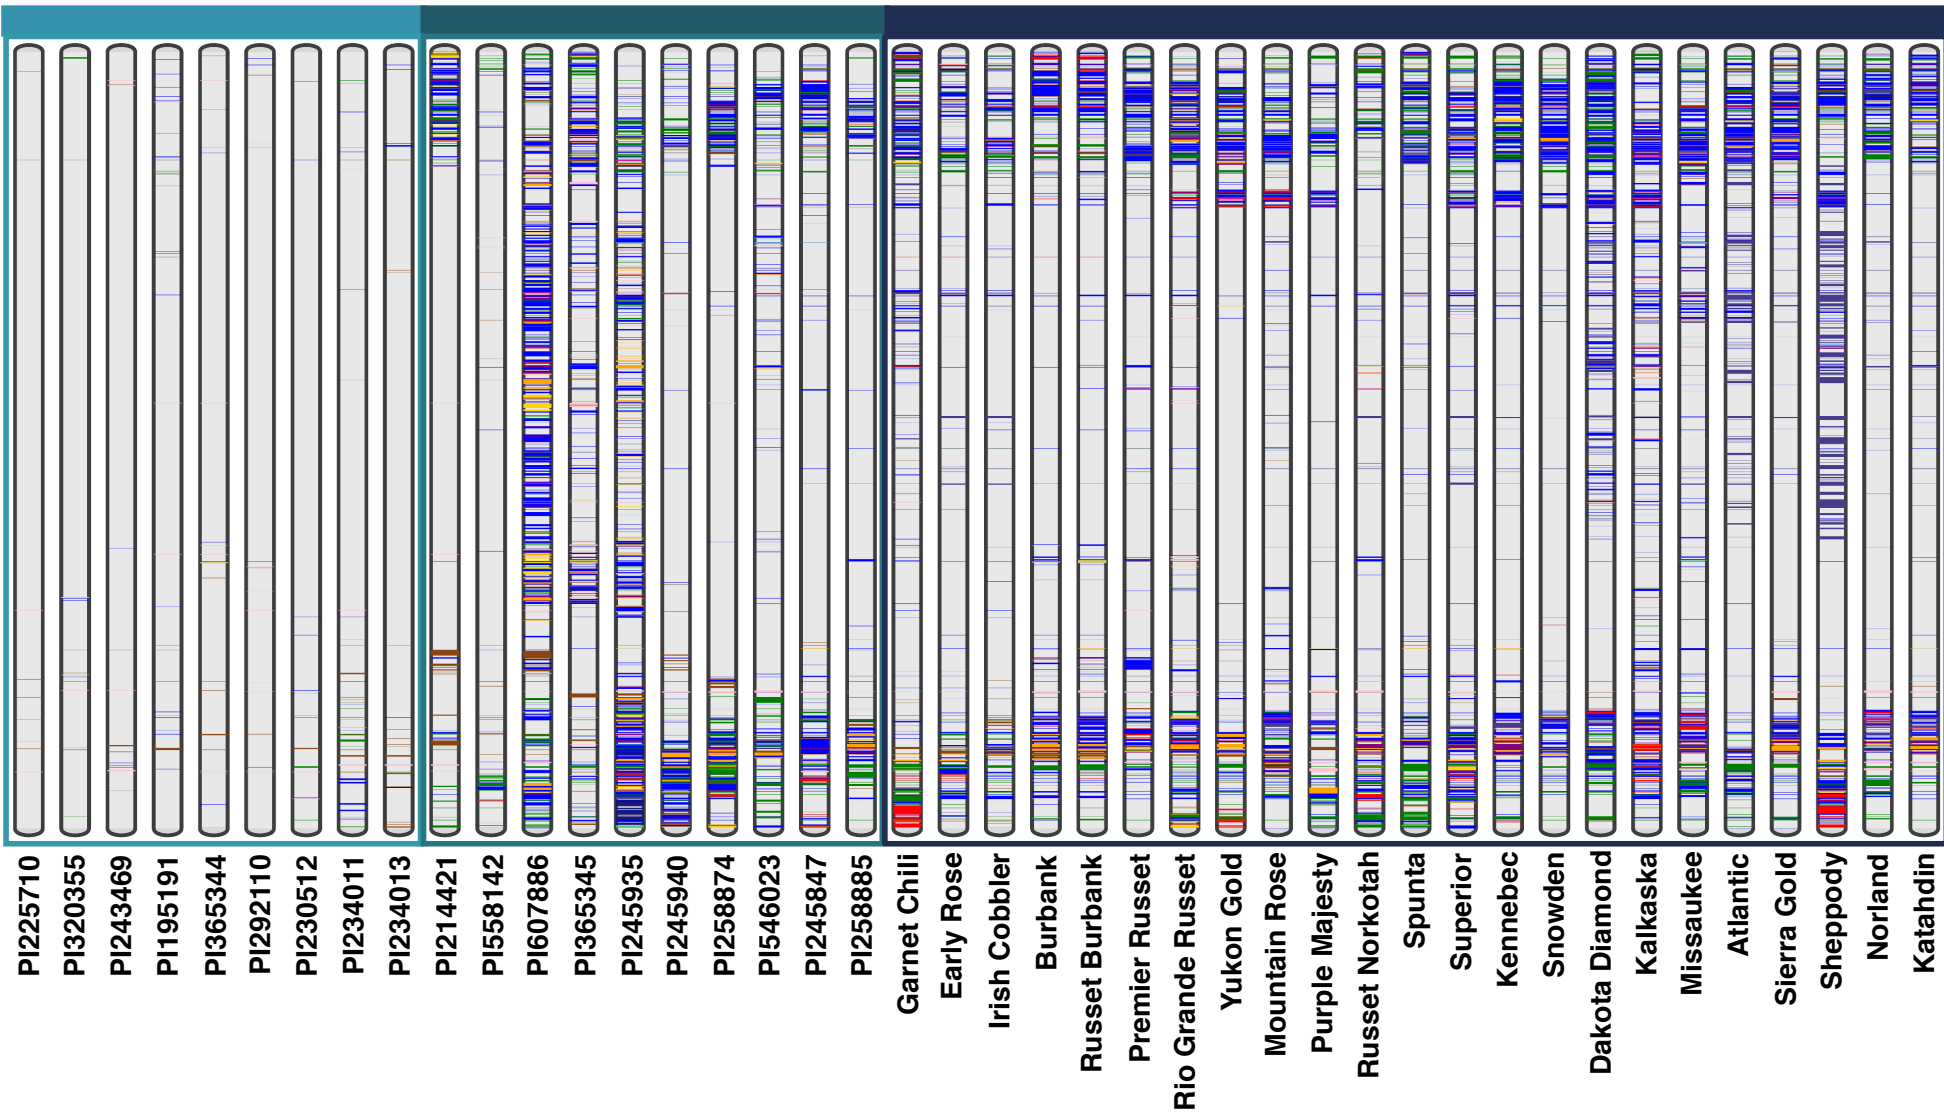

# Chromosome 5

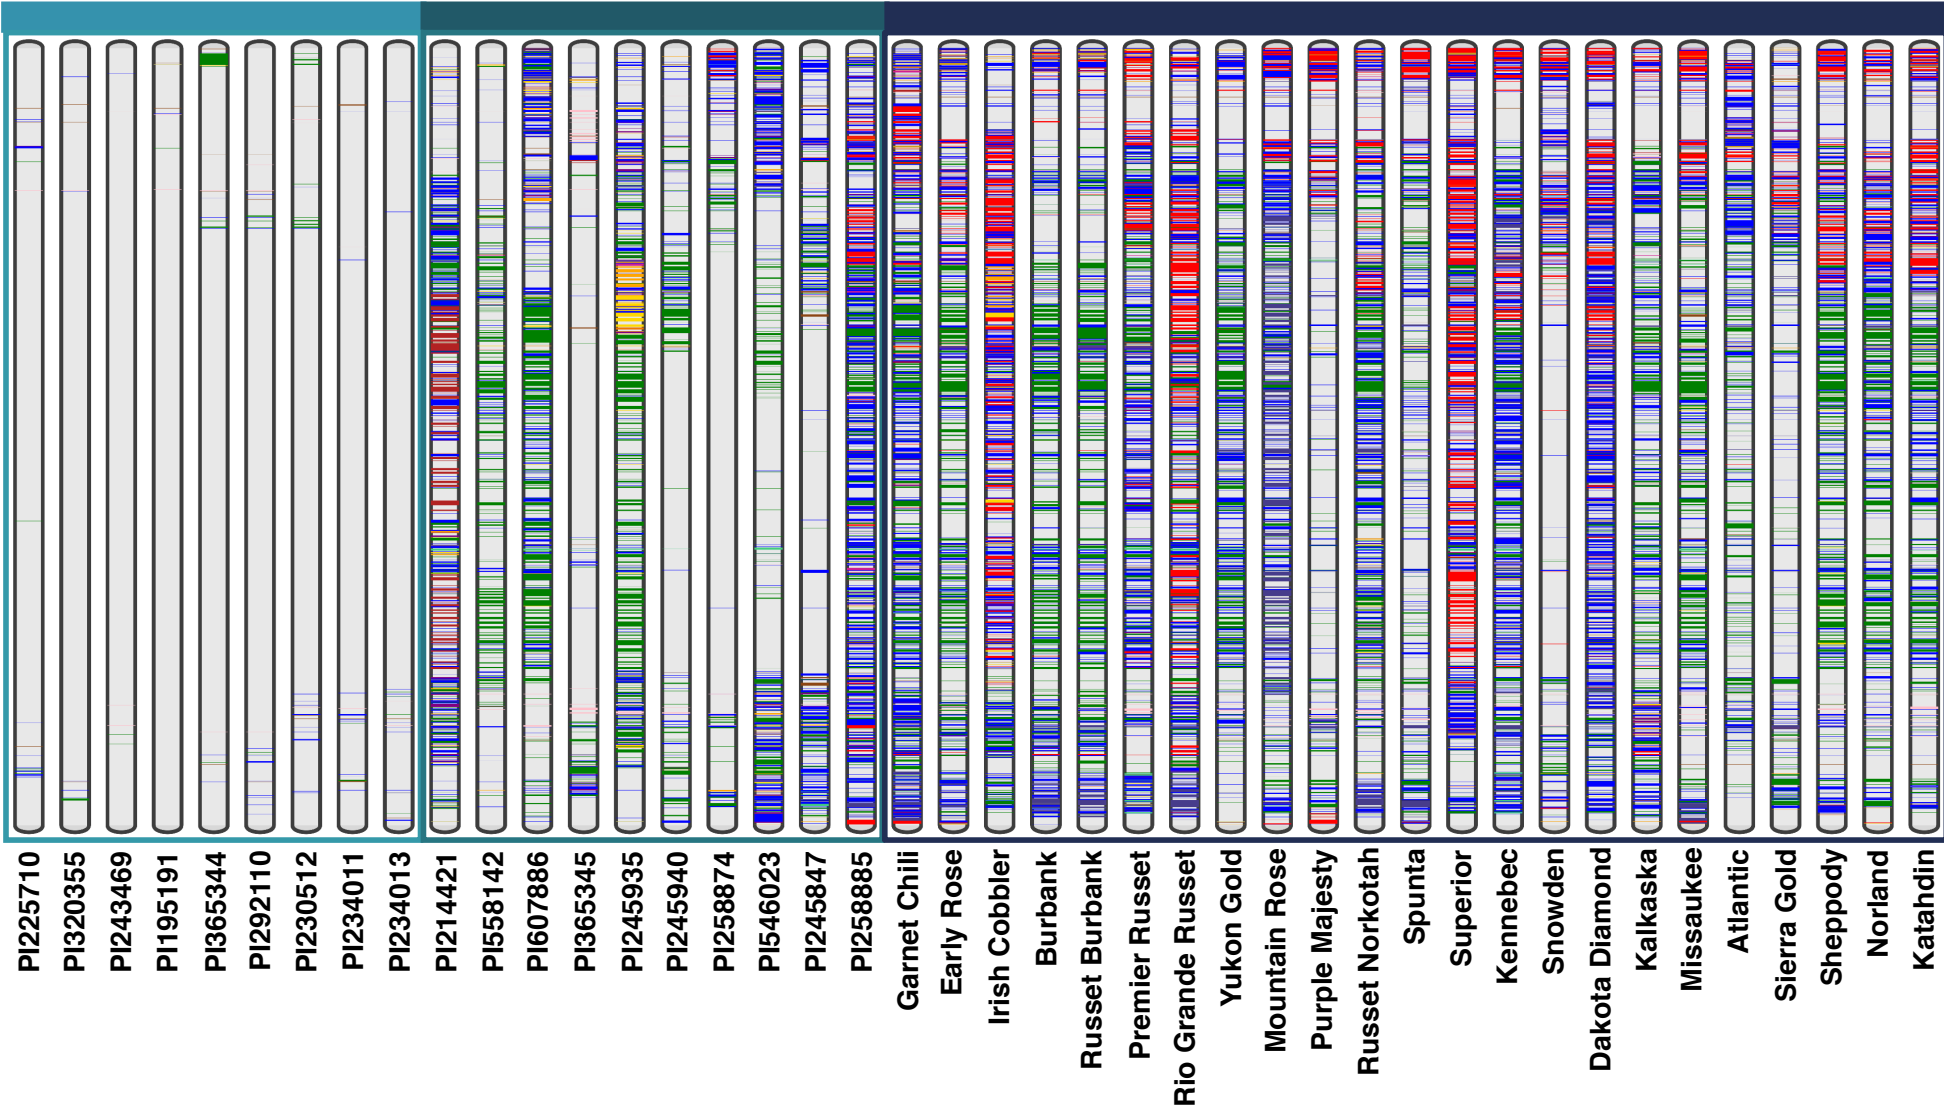

# Chromosome 6

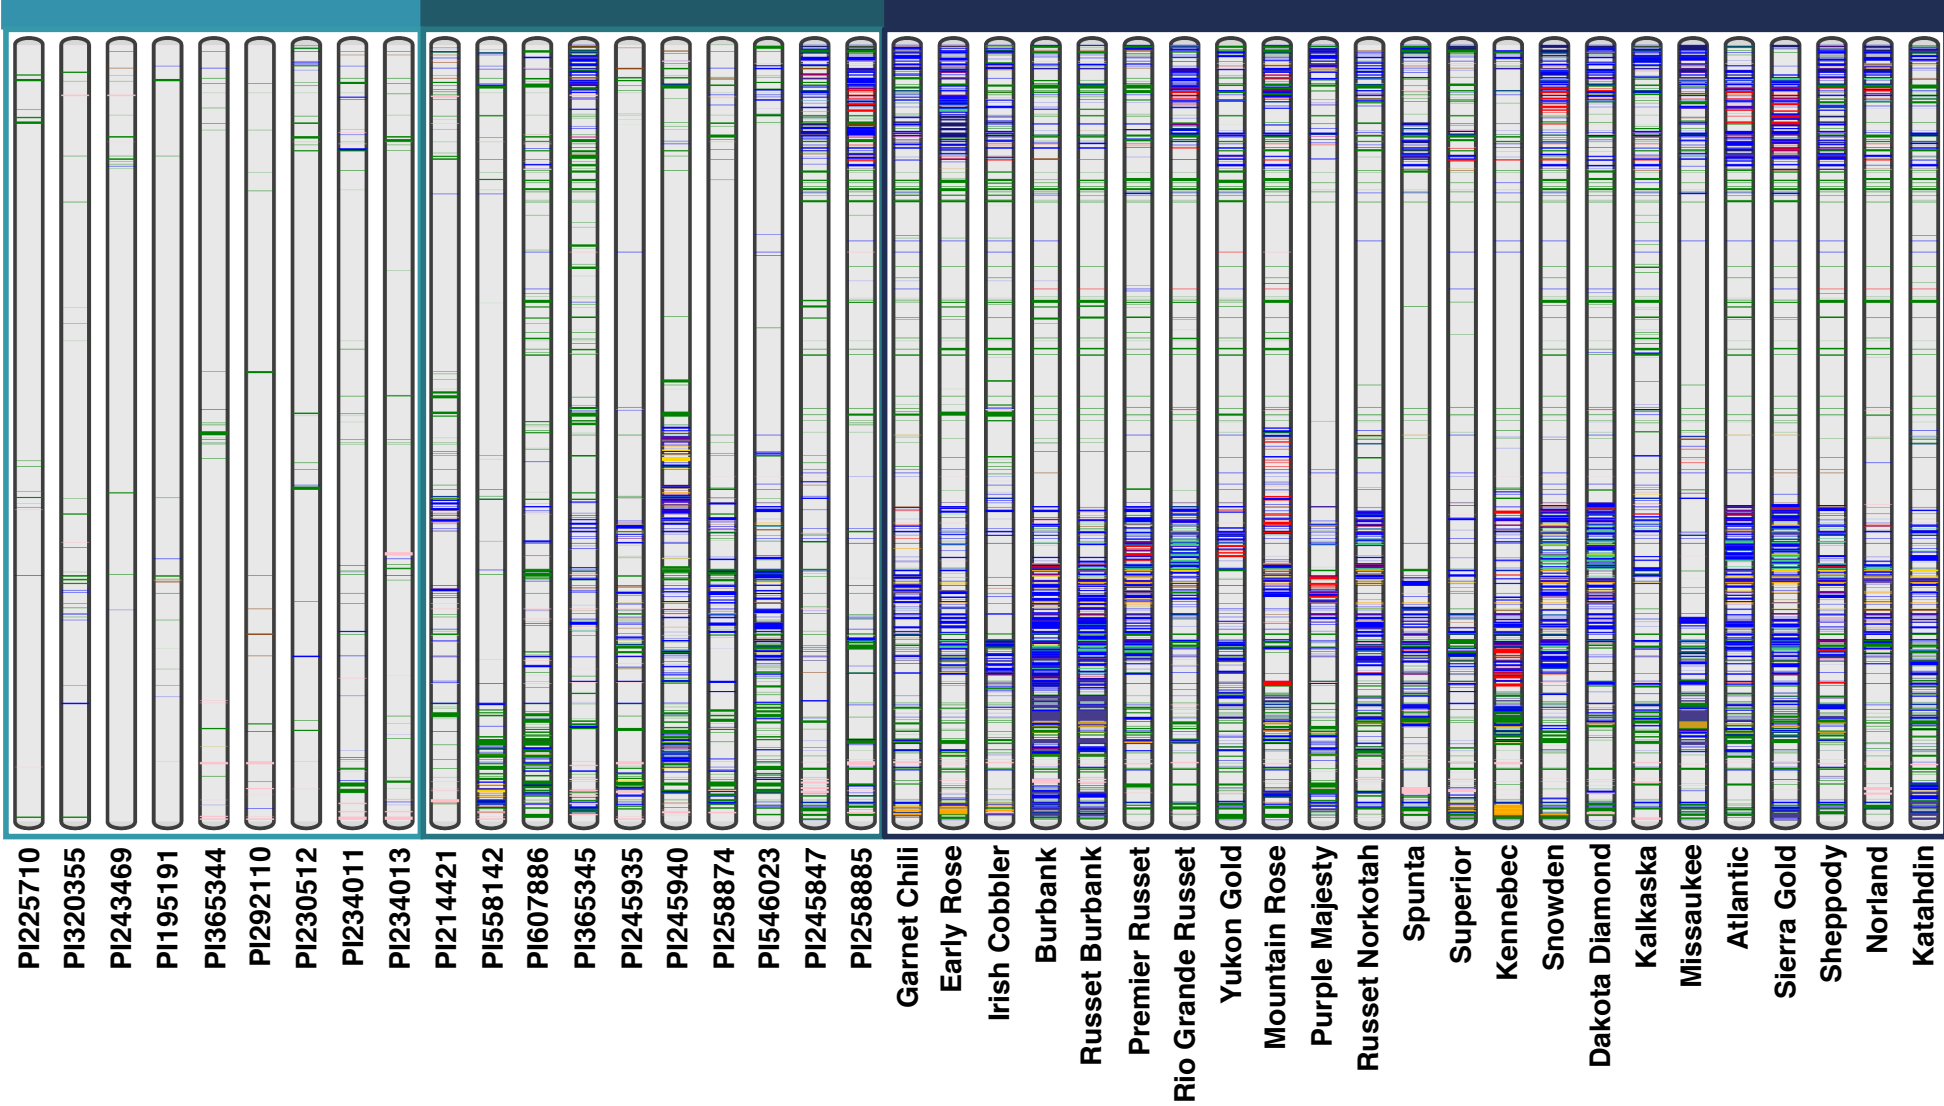

# Chromosome 7

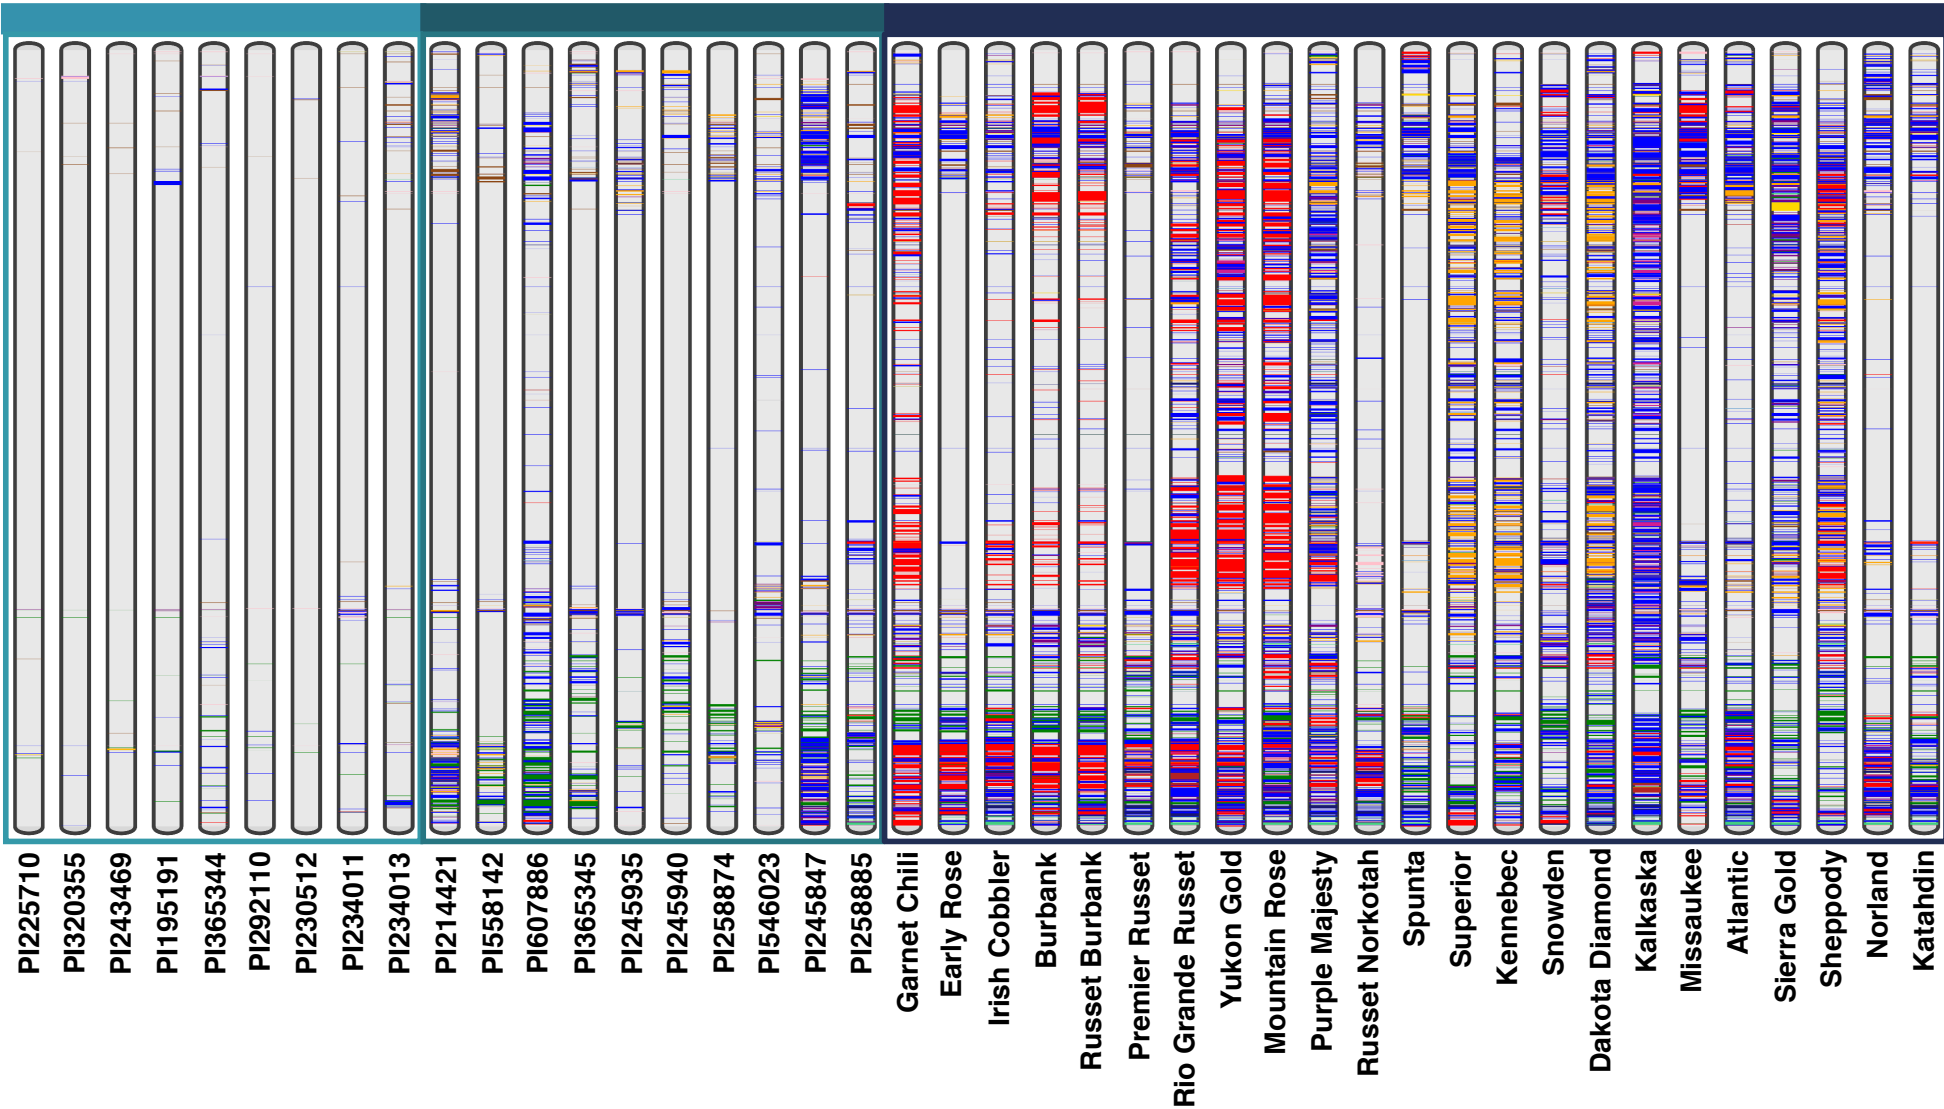

# Chromosome 8

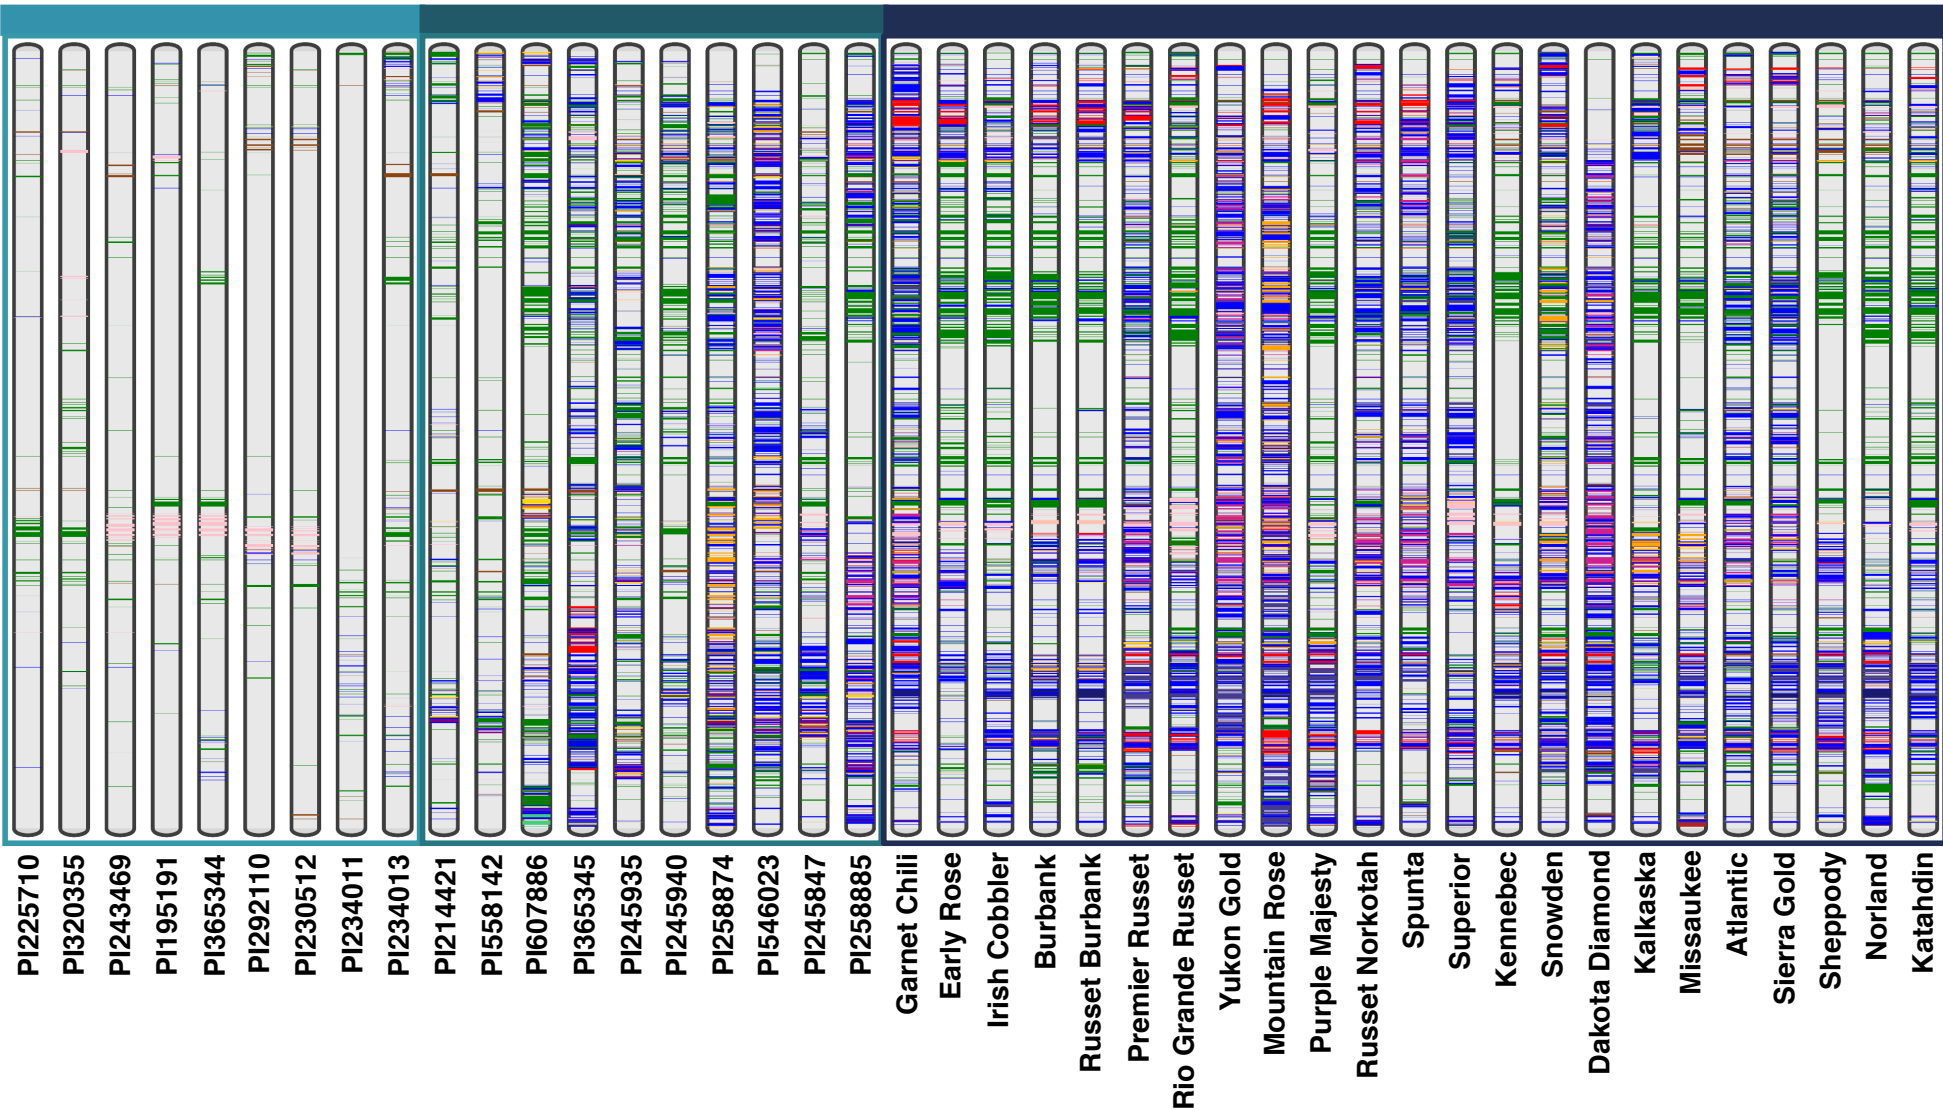



# Chromosome 9

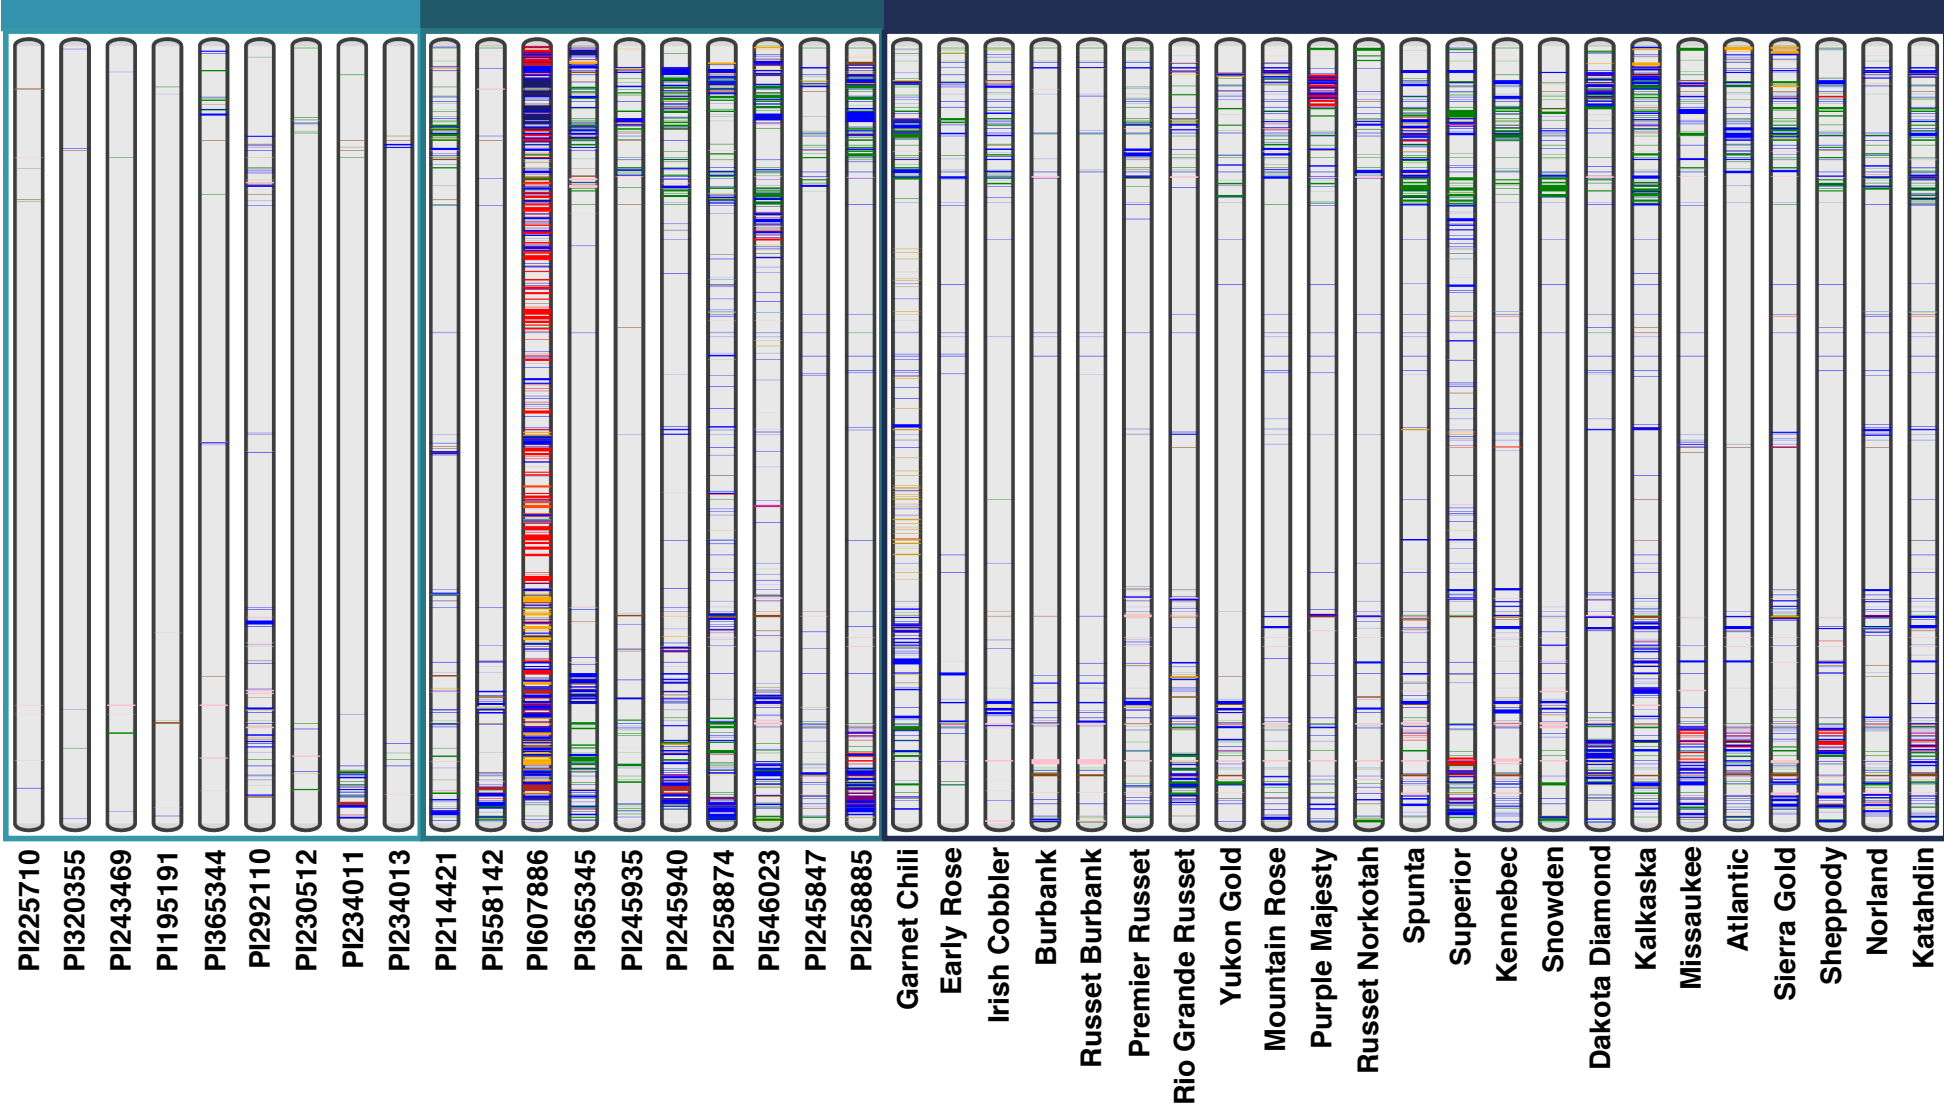

# Chromosome 10

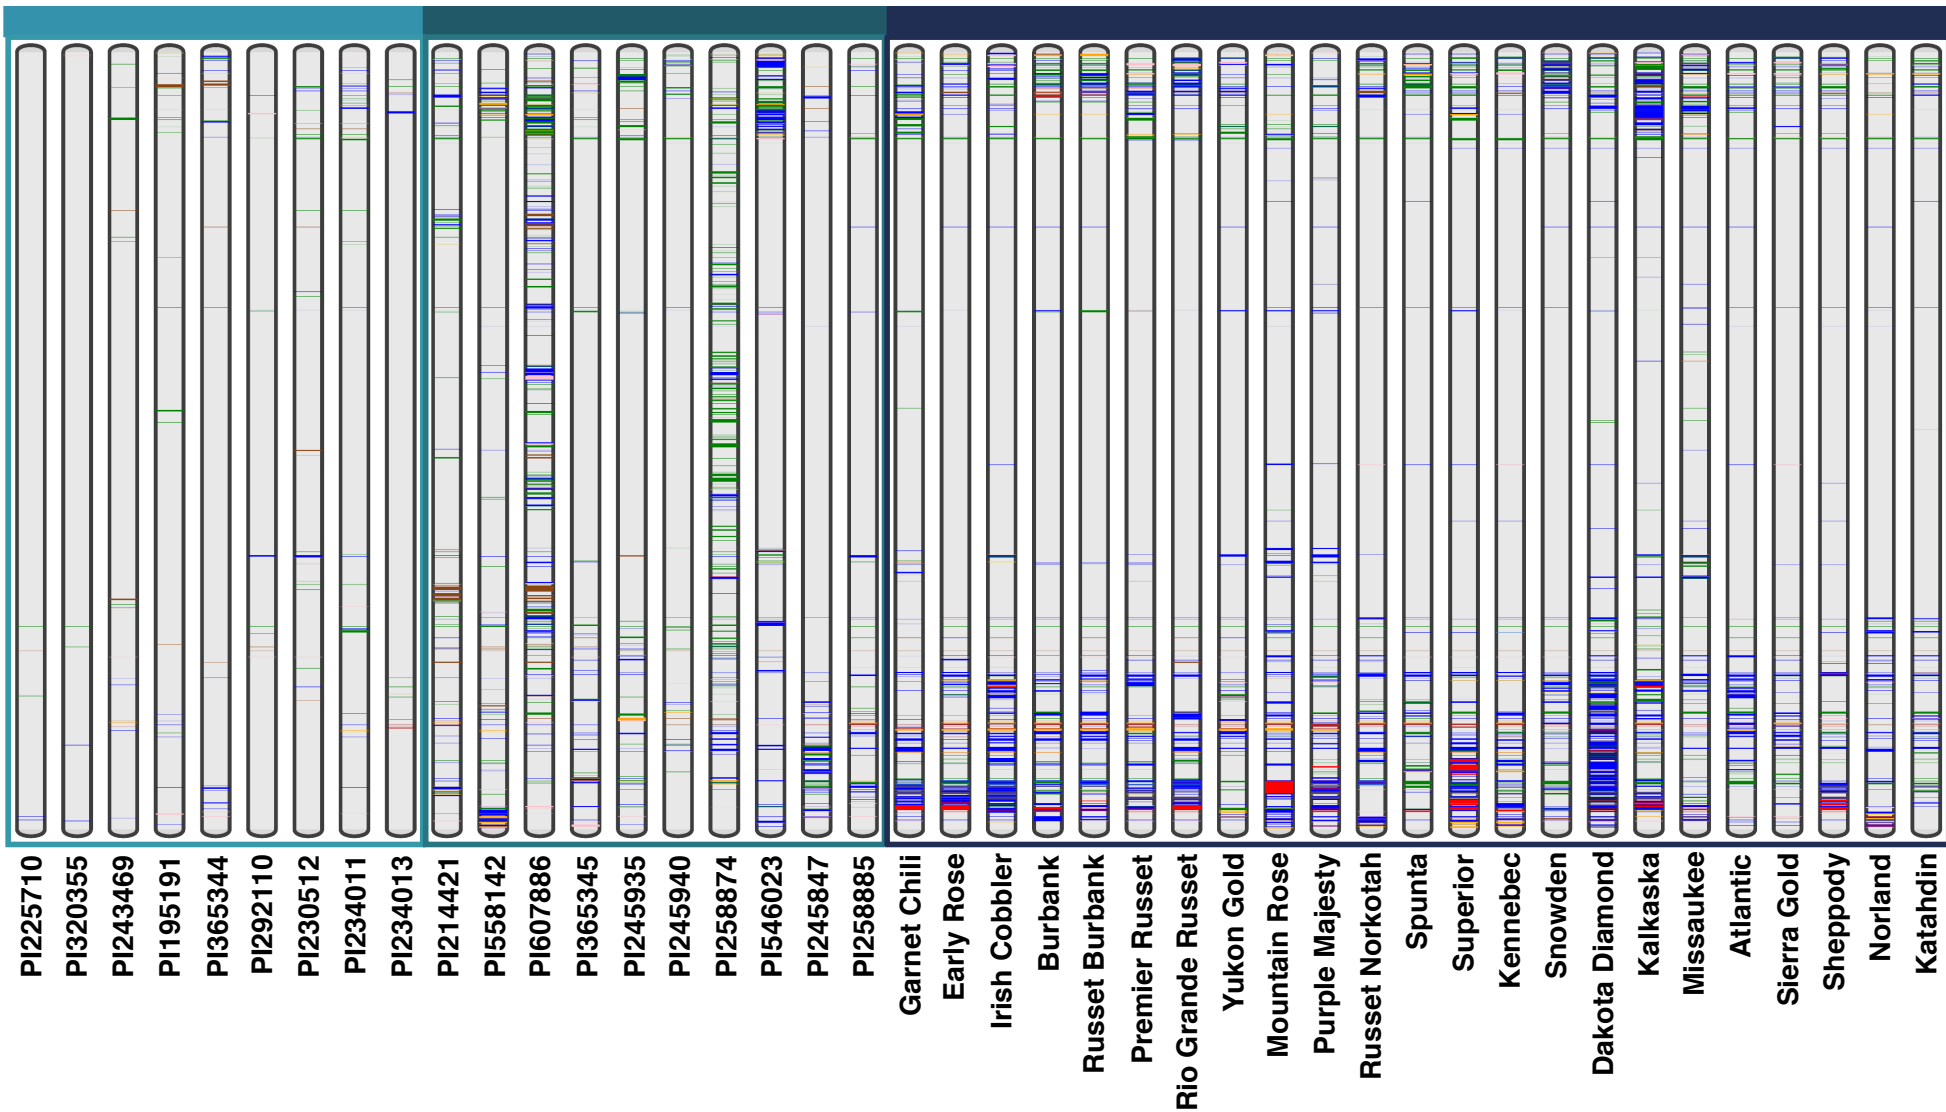

# Chromosome 11

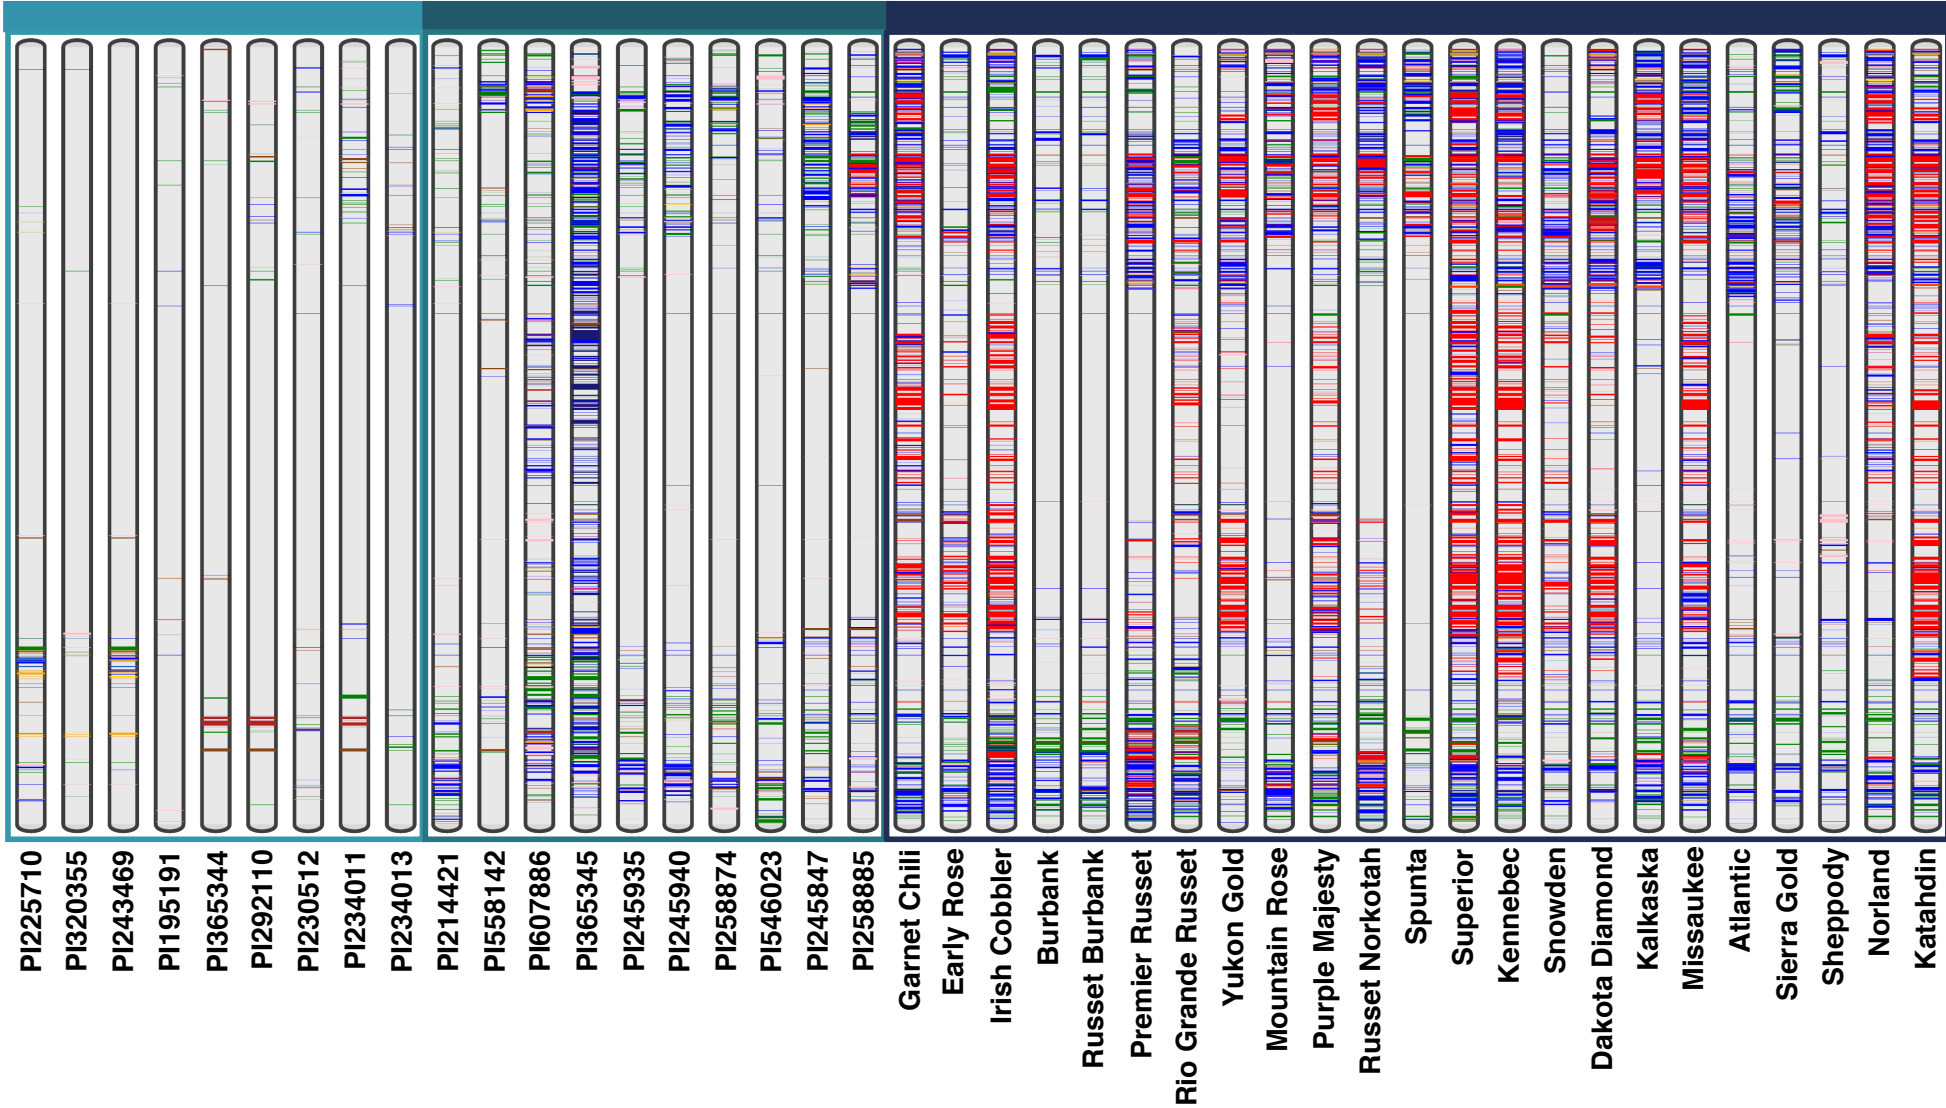

# Chromosome 12

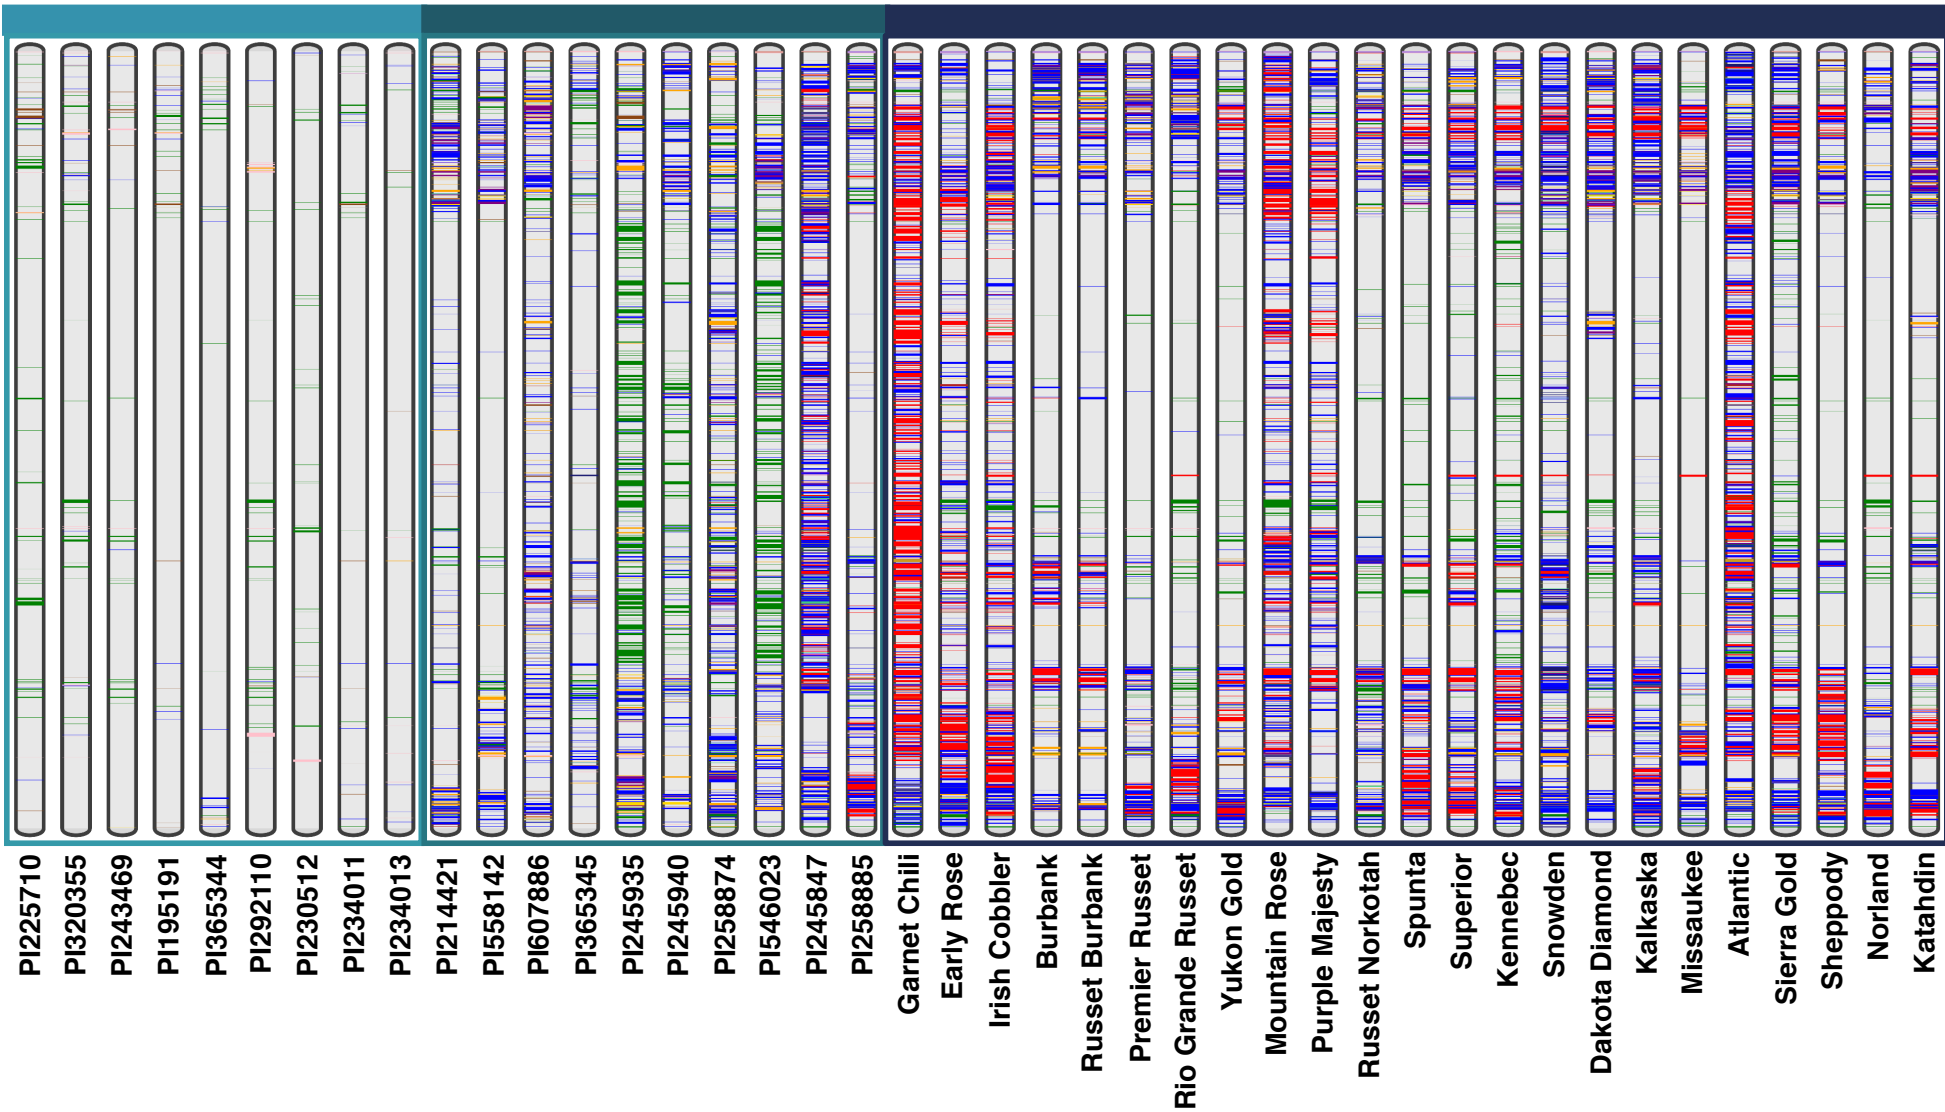

# Unanchored Scaffolds

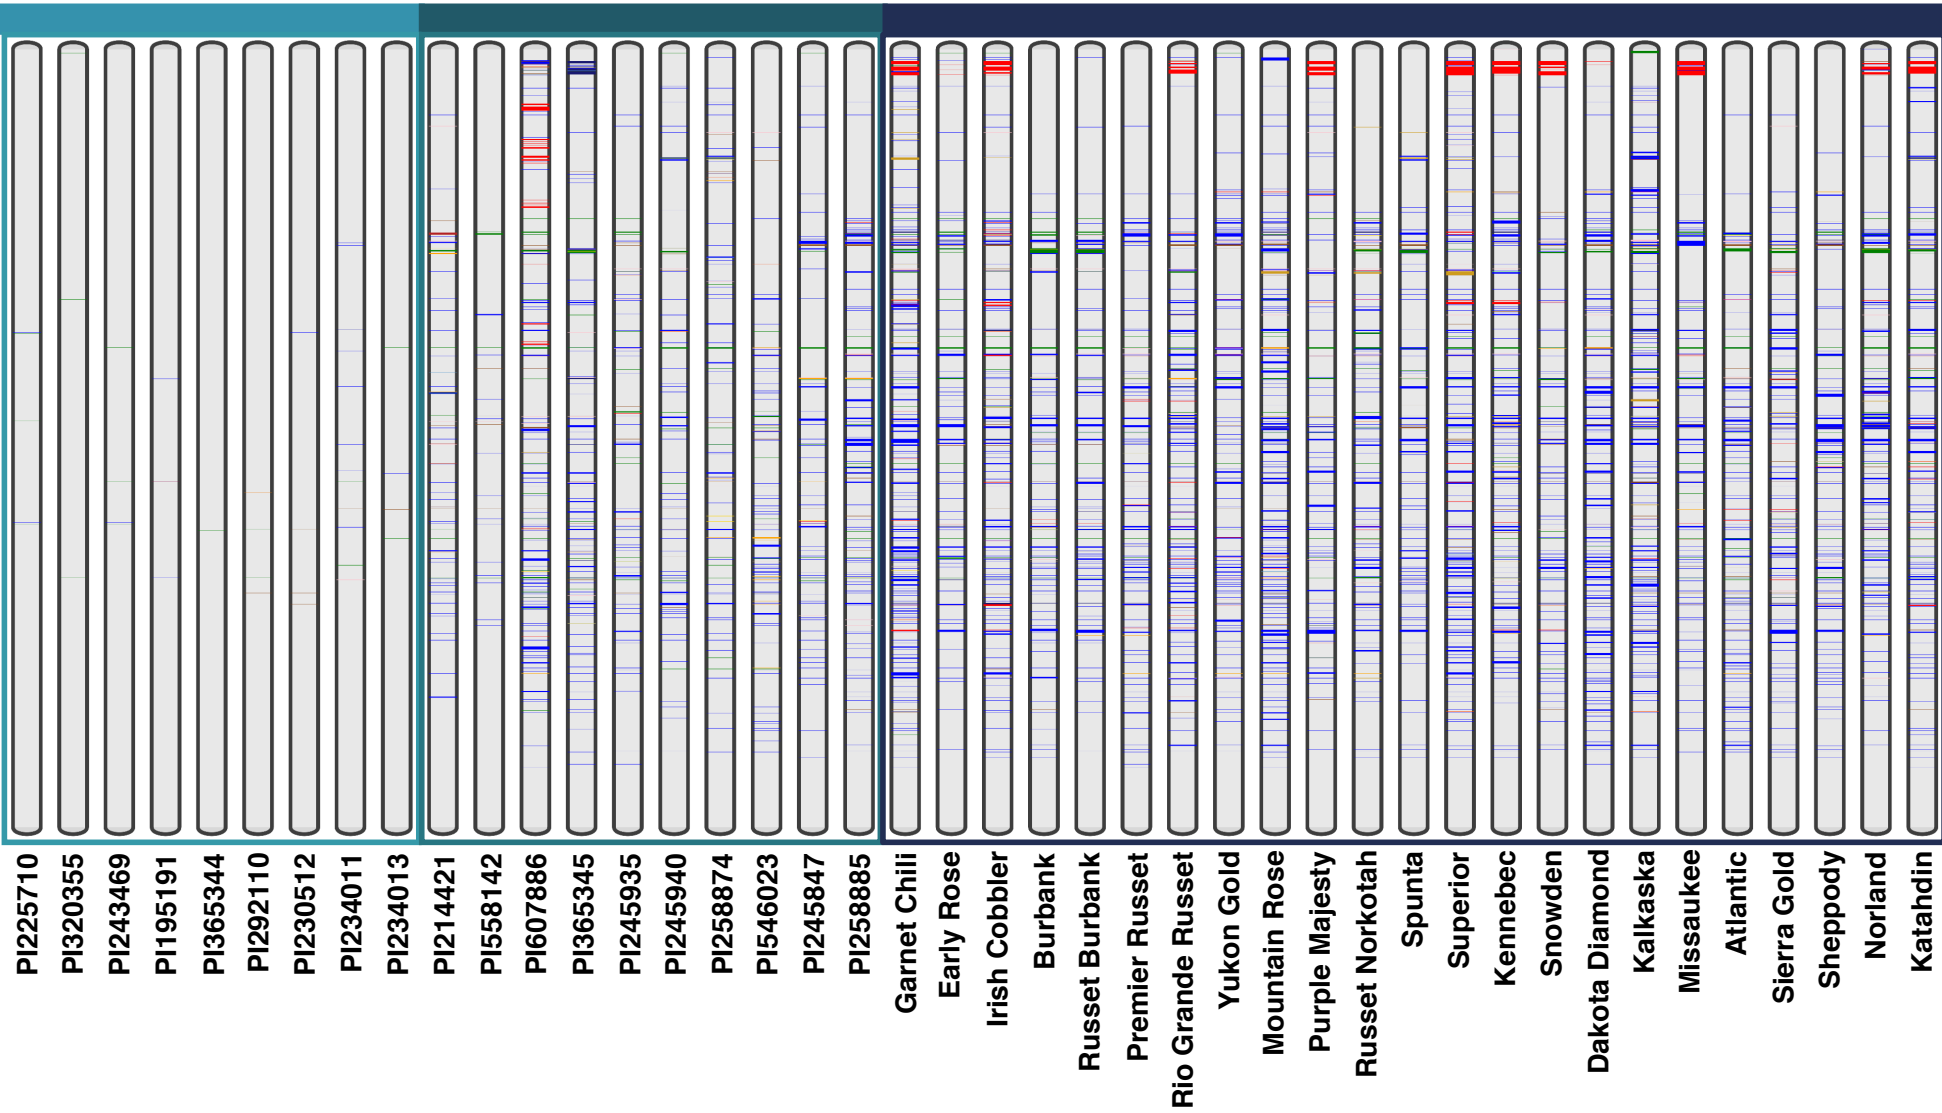

Supplement: pnas.1714380114.sd03.pdf [file pnas.1714380114.sd03.pdf]
